# Supplementary material
Source: publisher site journal article supplement (https://www.spandidos-publications.com/1013/downloadSupplementary)

Figure S1. Body weight of HSC-2 and SAS xenografts. (A) Body weight of HSC-2 xenograft mice was measured for 21 days. The values are means  $\pm$  SEM. (B) Body weight of SAS xenograft mice was measured for 21 days. The values are means  $\pm$  SEM.

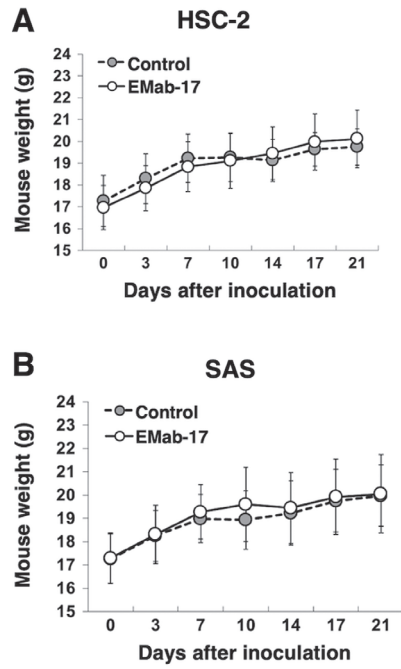

Supplement: Supplementary file [file downloadSupplementary]
